# Supplementary material for: Techno-economic assessment and carbon footprint of processes for the large-scale production of oxymethylene dimethyl ethers from carbon dioxide and hydrogen
Source: Royal Society of Chemistry journal article supplement (doi:10.1039/d1se01270c), 2021-11-15
Supplement: d1se01270c1.pdf [file d1se01270c1.pdf]

## Techno-economic assessment and Carbon footprint of processes for the large-scale production of Oxymethylene Dimethyl Ethers from Carbon Dioxide and Hydrogen

Received 00th January 20xx,  
Accepted 00th January 20xx

DOI: 10.1039/x0xx00000x

Franz Mantei<sup>a</sup>, Ramy E. Ali<sup>a</sup>, Cornelia Baensch<sup>b</sup>, Simon Voelker<sup>c</sup>, Philipp Haltenort<sup>d</sup>, Jakob Burger<sup>e</sup>, Ralph-Uwe Dietrich<sup>b</sup>, Niklas von der Assen<sup>c</sup>, Achim Schaadt<sup>a</sup>, Jörg Sauer<sup>d</sup> and Ouda Salem<sup>a\*</sup>

### 1. Extended process description

#### 1.1 Process routes P1 to P4 for the production of OME<sub>3-5</sub>

The process chain of P1 to P4 starts from the production of MeOH which is synthesized from H<sub>2</sub> and CO<sub>2</sub> at 250 °C and 70 bar in the gas phase.<sup>1</sup> For the purification the reactor product enters a first flash unit at 65 °C and 65 bar, a second flash unit at 66 °C and 1 bar and a distillation column operated at 1 bar to separate MeOH and H<sub>2</sub>O,<sup>2</sup> see Figure S1.

##### Process route P1

In the first process P1 one part of the MeOH is mixed with air and H<sub>2</sub>O and used to synthesize FA in the gas phase via partial oxidation and dehydrogenation over a silver catalyst at 650 °C and 1 bar. Subsequently FA is separated using an absorber.<sup>3</sup> In the absorber column a wastewater stream is used to separate FA from the gas stream. Due to the high concentration of about 45 m/m% H<sub>2</sub>O the product stream is concentrated to a FA rich stream containing about 86 m/m% FA and a H<sub>2</sub>O rich stream containing about 10 m/m% FA which is partly used as washing liquid in the FA absorber.<sup>4</sup> The FA rich stream is mixed with the second part of the MeOH product and used as a feed stream for the production of OME<sub>3-5</sub>. The synthesis of longer chain OME<sub>n</sub> in the liquid phase at 80 °C and 2 bar in presence of an acidic heterogeneous catalyst like Amberlyst® 46 leads to a variety of side products which are separated in two distillation columns and a membrane unit to separate the side product H<sub>2</sub>O.<sup>5</sup> The first distillation column operates at 1 bar and provides a bottom stream at 186 °C comprising mainly OME<sub>3-10</sub> and a distillate stream at 64 °C which contains the rest of the components and a fraction of the total feed amount of OME<sub>3</sub> of about 42 %. The distillate stream is sent to the membrane unit to separate H<sub>2</sub>O from the mixture and recycled to the synthesis of OME<sub>n</sub>.<sup>6</sup> The bottom stream is sent to the second distillation column operating at 0.078 bar which provides the main product stream containing OME<sub>3-5</sub> in the distillate at 80 °C and a bottom stream of OME<sub>6-10</sub> at 196 °C which is recycled back to the OME<sub>n</sub> synthesis. In comparison to the feed streams of MeOH and concentrated FA solution the mass flow of the recycled streams containing OME<sub>1-3,6-10</sub>, MeOH, FA and a rest of not separated H<sub>2</sub>O is about 5.4 times bigger. A simplified process flow sheet is shown in Figure S1.

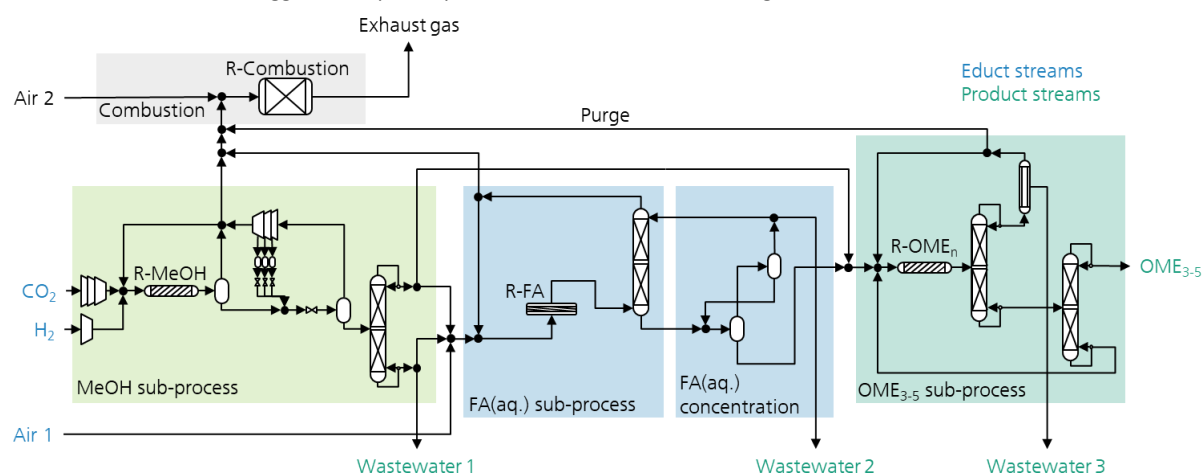

Figure S1 - Simplified process flow sheet for P1.

### Process route P2

The second process P2 uses a part of the MeOH product saturated in a  $N_2$  stream to certain desired concentration of 15 vol.-% to synthesize FA via dehydrogenation over  $Na_2CO_3$  or  $NaAlO_3$  at 900 °C and 2 bar and separate FA using an absorber and the second part of the MeOH product as washing liquid.<sup>7,8</sup> This separation of FA from the gas stream using an absorber with MeOH as washing liquid was adopted and adjusted from the FA(aqueous) sub-process which used  $H_2O$  instead. This concept was not yet described in the literature but due to the similar reaction system between MeOH and FA in comparison to FA and  $H_2O$  it is expected to yield a satisfying separation with probably slightly adjusted operational parameters. Furthermore, using  $H_2O$  as washing liquid is not a suitable strategy here since the advantage of an anhydrous FA stream would not be met.

The mixture contains about 63 m/m% FA and is used as a feed stream for the production of  $OME_{3-5}$ . This feed stream is converted to  $OME_{3-5}$  similar to the production of  $OME_{3-5}$  in P1. In comparison to P1, the amount of  $OME_3$  lost in the first distillation column to the distillate product is about 27 %. Furthermore, the ratio of the mass flows of the recycled streams to the feed stream reduces to 4.4.

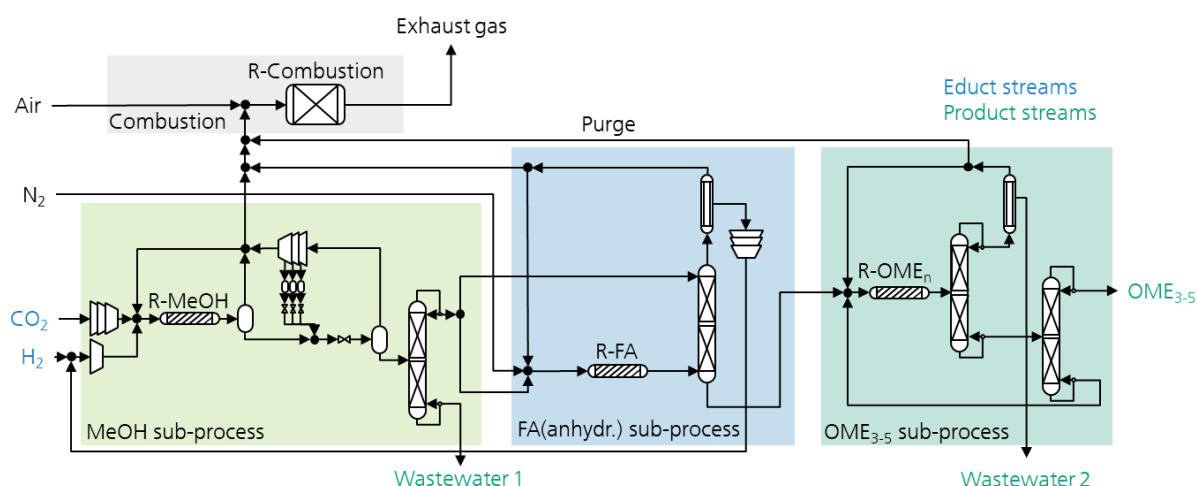

Figure S2 - Simplified process flow sheet for P2.

### Process route P3

In the third process P3 a part of the MeOH product is used to produce FA following the FA(aqueous) sub-process. Parts of the product stream of the FA absorber is mixed with the second part of the MeOH product and used to produce  $OME_1$ .  $OME_1$  is synthesized over an acidic heterogeneous catalyst like Amberlyst® 15 at 60 °C and 2 bar and purified using a series of a reactive distillation column with catalytic zones and a second distillation column.<sup>3</sup> The reactive distillation column is operated at 1 bar and produces a distillate stream containing an azeotropic mixture of  $OME_1$  and MeOH with 94 m/m%  $OME_1$  at 40 °C, a bottom stream containing mainly  $H_2O$  at 98 °C and a gaseous side stream below the catalytic zone containing 84 m/m% MeOH at 67 °C which is recycled back to the  $OME_1$  reactor. The second distillation column splits the azeotropic mixture of  $OME_1$  and MeOH at a higher pressure of 4 bar into a distillate stream containing the new azeotropic mixture of about 91 m/m%  $OME_1$  and MeOH at 85 °C and an almost pure  $OME_1$  bottom stream at 88 °C. The  $OME_1$  product stream is mixed with the FA rich stream and used as a feed stream for the production of  $OME_{3-5}$ . The production of  $OME_{3-5}$  is similar to P1. In comparison to P1 the amount of  $OME_3$  lost in the first distillation column to the distillate product is 37 %. Furthermore, in comparison to the feed streams the mass flow of the recycled streams is 4.8 times bigger.

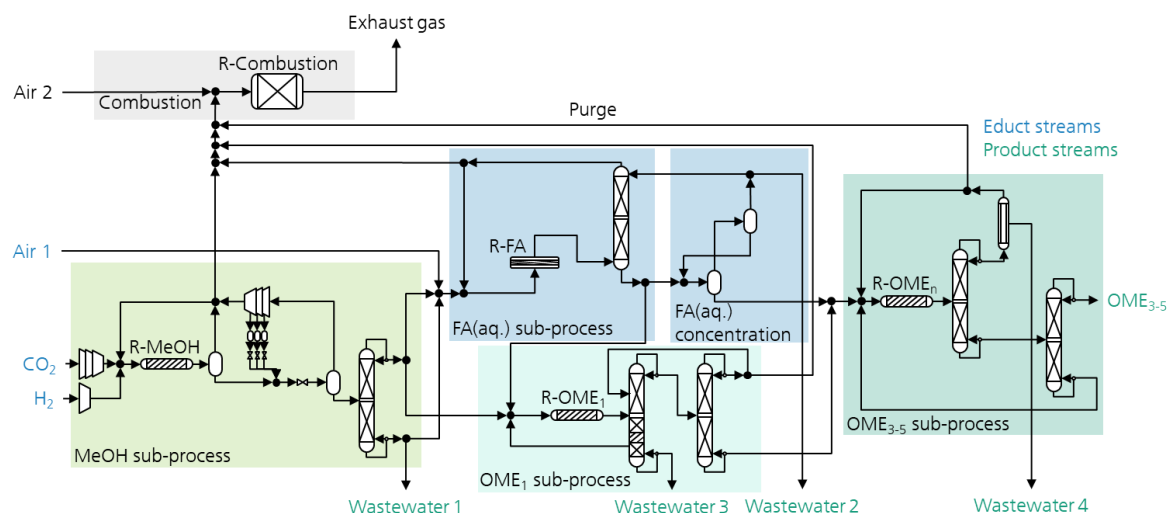

Figure S3 – Simplified process flow sheet for P3.

#### Process route P4

The fourth process P4 is a combination of P2 and P3 and uses one part of the MeOH product to produce FA following the FA(anhydrous) sub-process. One part of the product stream of the FA reactor is sent to an absorber in which the second part of the MeOH product is used as a washing liquid and the product stream containing about 68 m/m% MeOH is sent to the OME<sub>1</sub> sub-process. The absorption of the second part of the product stream of the FA reactor uses a recycled stream of the OME<sub>3-5</sub> sub-process which mainly contains OME<sub>1-3</sub>. This concept should be experimentally proven since the solubility of FA in OME mixtures not containing MeOH or H<sub>2</sub>O was not yet investigated to the best of our knowledge. However, substituting the OME mixture with MeOH or H<sub>2</sub>O is not a suitable strategy since their presence in the synthesis of longer chain OME<sub>n</sub> would increase the side product formation, including H<sub>2</sub>O. Therefore, the advantage regarding the H<sub>2</sub>O separation unit in comparison to P1 to P3 would not be met. The product stream containing FA and a mixture of OME<sub>1-3</sub> is mixed with the OME<sub>1</sub> product stream and used as a feed stream for the production of OME<sub>3-5</sub>. The sub-processes of OME<sub>1</sub> and OME<sub>3-5</sub> are similar to P3. The main difference is the amount of H<sub>2</sub>O separated in the sub-process of the OME<sub>3-5</sub> production. Starting from OME<sub>1</sub> and anhydrous FA only very small amounts of H<sub>2</sub>O and MeOH enter this sub-process in form of impurities. However, to prevent accumulation H<sub>2</sub>O needs to exit the process. Furthermore, only 31 % of OME<sub>3</sub> is lost in the first distillation column to the distillate product and the ratio between the mass flow of the feed stream and the recycled streams is reduced to 3.1.

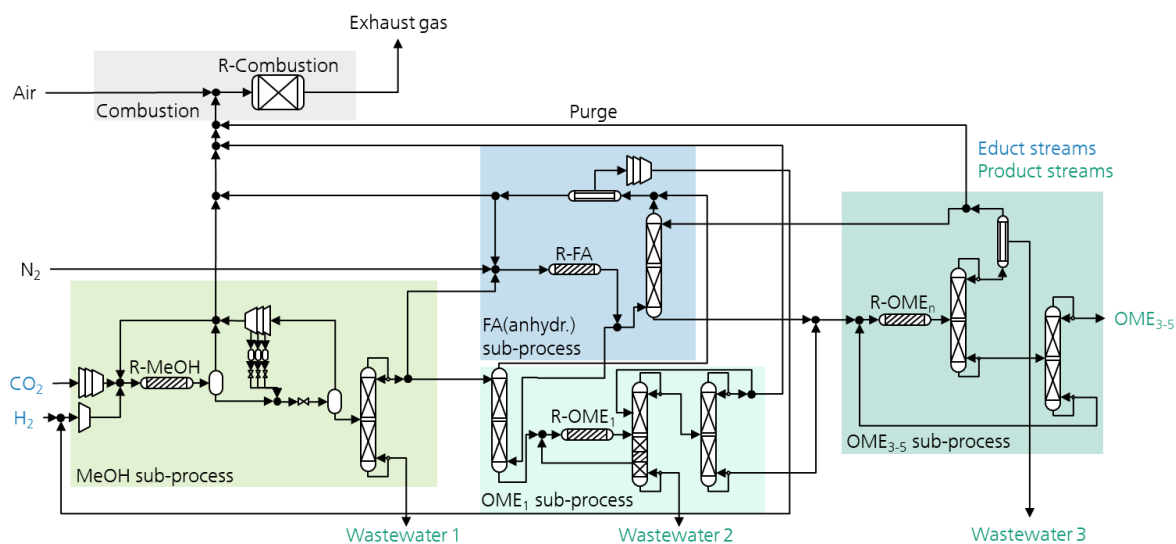

Figure S4 – Simplified process flow sheet for P4.

## 2 Process modelling and simulation

### 2.1 Pure component properties

Properties of the pure components used for the simulations are listed in Table S1.

Table S1 - Pure component properties.

| Component                                                                                                             | Parameter                                                                                                        | Reference                |
|-----------------------------------------------------------------------------------------------------------------------|------------------------------------------------------------------------------------------------------------------|--------------------------|
| CO, CO <sub>2</sub> , FA, H <sub>2</sub> , H <sub>2</sub> O, MeOH, N <sub>2</sub> , O <sub>2</sub> , OME <sub>1</sub> | $c_p^{ig}$ , $g_0$ , $h_0$ , $\Delta_v h$ , $\rho_c$ , $\rho^V$ , $T_c$ , $\eta$ , $\lambda$ , $\rho$ , $\sigma$ | Aspen Database DB-PURE32 |
| H <sub>2</sub> , MeOH, OME <sub>1</sub> , OME <sub>3-5</sub>                                                          | LHV                                                                                                              | 9                        |
| HF <sub>1</sub>                                                                                                       | $c_p^{ig}$ , $g_0$ , $h_0$ , $\rho_c$ , $T_c$ , $\eta$ , $\lambda$ , $\sigma$                                    | 3,10                     |
| MG <sub>1</sub>                                                                                                       | $\Delta_v h$ , $\rho^V$                                                                                          | 3,10–12                  |
| HF <sub>n</sub> , MG <sub>n</sub> , n>1                                                                               | $c_p^{ig}$ , $g_0$ , $h_0$ , $\rho_c$ , $T_c$ , $\eta$ , $\lambda$ , $\sigma$                                    | 3,11                     |
| OME <sub>2</sub> -OME <sub>10</sub>                                                                                   | $\rho^V$                                                                                                         | 3,13                     |
| OME <sub>2</sub> -OME <sub>5</sub>                                                                                    | $c_p^{ig}$ , $g_0$ , $h_0$ , $\rho_c$ , $\eta$ , $\lambda$ , $\sigma$                                            | 14                       |
|                                                                                                                       | $\Delta_v h$ , $\rho^V$ , $T_c$                                                                                  |                          |
|                                                                                                                       | $\rho$                                                                                                           |                          |

### 2.2 Thermodynamic model for mixtures

A UNIFAC based model for mixtures containing FA, MeOH and H<sub>2</sub>O was introduced by Maurer et al.<sup>15</sup> This model simultaneously considers the interactions between the components in the liquid phase and the chemical reactions between FA and MeOH as well as FA and H<sub>2</sub>O yielding the formation of poly-(oxymethylene) hemiformals and poly-(oxymethylene) glycols according to OME<sub>1</sub> reactions (see eq. 9-13 in manuscript). Due to the fast kinetics of these reactions the assumption that the equilibrium composition will be reached instantaneously shows good agreement with the experimental results of vapor liquid equilibrium investigations. This model was further developed in the following decades adding new components like TRI and OME<sub>n</sub> and adjusting the interaction parameters to new experimental data. Recently Schmitz et al.<sup>16</sup> published a new version of the model considering OME<sub>n</sub>. Bongartz et al.<sup>3</sup> implemented the model version published by Kuhnert et al.<sup>17</sup> in Aspen Plus<sup>®</sup> and published the corresponding Aspen Plus<sup>®</sup> files. To include the chemical reactions of FA and MeOH as well as FA and H<sub>2</sub>O Bongartz et al.<sup>3</sup> used the Chemistry section in Aspen Plus<sup>®</sup> which can be used to consider liquid phase equilibrium reactions. The UNIFAC interaction parameters were slightly reformulated to enable the implementation in Aspen Plus<sup>®</sup>, i.e. the temperature dependency was neglected, instead the values at 300 K were considered. In our work we used the Aspen Plus<sup>®</sup> model from Bongartz et al.<sup>3</sup> and adjusted it to consider the temperature dependency of the UNIFAC interaction parameters. Therefore, the model to calculate the liquid phase activity coefficient was adjusted to UNIFC-PSRK from the PSRK property model Gamma (GMUFPSRK) which enables the consideration of temperature dependent interaction parameters and showed slightly better results in the validation against experimental published results than the original model from Bongartz et al.<sup>3</sup>, see Table S3. Furthermore, the UNIFAC parameters were adjusted to the ones published by Schmitz et al.<sup>16</sup> The equation of the temperature dependent UNIFAC interaction parameters for the sub-system H<sub>2</sub>O and CH<sub>2</sub>OH has the form of eq. 1, where  $a_{ij}$  is the UNIFAC interaction parameter of the sub-system  $i$ , here H<sub>2</sub>O and  $j$ , here CH<sub>2</sub>OH. A, B and C are the fitting parameters and T is the temperature in K.

$$a_{ij}(T) = A + \frac{B}{T[K]} \quad (1)$$

$$a_{ij}(T) = A + B \cdot T[K] + C \cdot T^2[K^2] \quad (2)$$

In Aspen Plus<sup>®</sup> the temperature dependency can be expressed according to eq. 2, therefore the equations were adjusted and refitted. The results are presented in Table S2 and Figure S5.

Table S2 - Refit of UNIFAC interaction parameters.

|                               | A        | B       | C       |
|-------------------------------|----------|---------|---------|
| $a_{2,8}$ Eq. (1), Literature | 451.64   | -114100 | 0       |
| $a_{2,8}$ Eq. (2), Refit      | -521.15  | 2.7288  | -0.0025 |
| $a_{8,2}$ Eq. (1), Literature | -1018.57 | 329900  | 0       |
| $a_{8,2}$ Eq. (2), Refit      | 1794.1   | -7.8899 | 0.0073  |

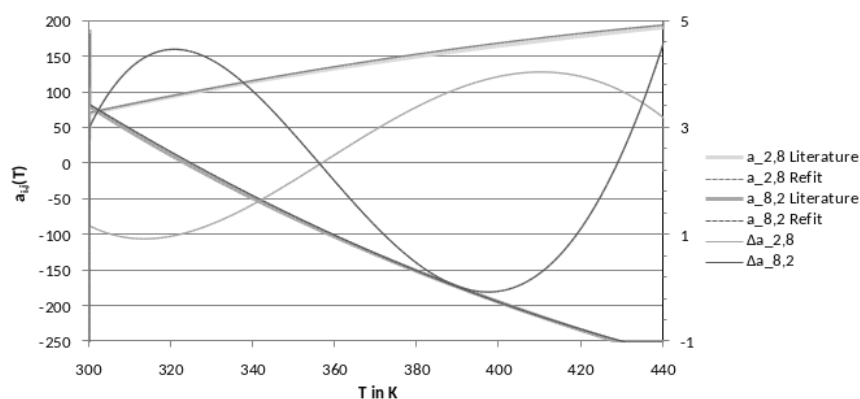

Figure S5 - Refit of UNIFAC interaction parameters.

Figure S5 shows a good agreement between the refitted equation of the UNIFAC interaction parameters and the equation from Schmitz et al.<sup>16</sup> Deviations are in a much smaller range than the values in the considered temperature range. The improvements regarding the description of the phase behavior is shown in Table S3.

### 2.3 Validation

For the validation of the implemented thermodynamic model describing the interactions in the liquid and vapor phase several experimental VLE data from different literature sources were used. The results are listed in Table S3.

**Table S3** - Deviation of model predicted VLE data and experimental VLE data for four different models. The model Reference contains the model predictions from the literature sources presenting the experimental data. This work contains the model predictions from the model used for the process simulation in this work<sup>3</sup> contains the model predictions from the model published by Bongartz et. al.<sup>3,\*</sup> contains the model predictions from the model published by Bongartz et. al.<sup>3</sup> and updated with the interaction parameters from Schmitz et. al.,<sup>16</sup> however still not considering the temperature dependency of the UNIFAC interaction parameters.

| Sub-System                                            | Reference   | Data sets | Model           | $\Delta$ Average [%] | $\Delta y_{FA}$ [%] | $\Delta y_{MeOH}$ [%] | $\Delta y_{H_2O}$ [%] | $\Delta y_{OME1}$ [%] | $\Delta y_{OME2}$ [%] | $\Delta T$ [%] | $\Delta p$ [%] |      |
|-------------------------------------------------------|-------------|-----------|-----------------|----------------------|---------------------|-----------------------|-----------------------|-----------------------|-----------------------|----------------|----------------|------|
| FA/<br>MeOH                                           | 18–20       | 54        | Reference       | 3.0%                 | 6.5%                | 1.0%                  | -                     | -                     | -                     | 0.4%           | 4.1%           |      |
|                                                       |             |           | This work       | 4.7%                 | 10.9%               | 3.7%                  |                       |                       | 0.3%                  | 3.9%           |                |      |
|                                                       |             |           | <sup>3,3*</sup> | 4.6%                 | 10.7%               | 3.6%                  |                       |                       | 0.3%                  | 3.8%           |                |      |
|                                                       |             |           |                 | 4.6%                 | 10.7%               | 3.6%                  |                       |                       | 0.3%                  | 3.8%           |                |      |
| FA/<br>MeOH/<br>H <sub>2</sub> O                      | 15,18,21–23 | 246       | Reference       | 4.3%                 | 6.9%                | 6.5%                  | 6.1%                  | -                     | -                     | 0.2%           | 2.0%           |      |
|                                                       |             |           | This work       | 4.2%                 | 7.4%                | 5.8%                  | 5.5%                  |                       |                       | 0.2%           | 2.2%           |      |
|                                                       |             |           | <sup>3,3*</sup> | 5.6%                 | 10.7%               | 7.8%                  | 6.2%                  |                       |                       | 0.3%           | 3.0%           |      |
|                                                       |             |           |                 | 5.6%                 | 10.7%               | 7.8%                  | 6.2%                  |                       |                       | 0.3%           | 3.0%           |      |
| FA/<br>MeOH/<br>H <sub>2</sub> O/<br>OME <sub>1</sub> | 10,24       | 45        | Reference       | 21.1%                | 26.4%               | 19.7%                 | 8.9%                  | 67.7%                 | -                     | 0.6%           | 3.4%           |      |
|                                                       |             |           | This work       | 14.7%                | 26.1%               | 19.1%                 | 10.9%                 | 55.4%                 |                       |                | 0.8%           | 5.4% |
|                                                       |             |           | <sup>3,3*</sup> | 15.2%                | 27.9%               | 22.2%                 | 8.8%                  | 55.0%                 |                       |                | 0.6%           | 6.7% |
|                                                       |             |           |                 | 15.2%                | 27.9%               | 22.2%                 | 8.8%                  | 55.0%                 |                       |                | 0.6%           | 6.7% |
| FA/<br>MeOH/<br>H <sub>2</sub> O/<br>OME <sub>2</sub> | 16          | 6         | Reference       | -                    | -                   | -                     | -                     | -                     | -                     | -              | -              |      |
|                                                       |             |           | This work       | 9.4%                 | 27.6%               | 4.2%                  | 15.8%                 |                       | 8.3%                  | 0.2%           |                |      |
|                                                       |             |           | <sup>3,3*</sup> | 14.9%                | 38.0%               | 3.6%                  | 23.8%                 |                       | 23.0%                 | 0.6%           |                |      |
|                                                       |             |           |                 | 7.0%                 | 26.0%               | 4.0%                  | 3.5%                  |                       | 8.4%                  | 0.2%           |                |      |
| FA/<br>MeOH/<br>OME <sub>1</sub>                      | 10          | 17        | Reference       | 10.0%                | 16.3%               | 7.3%                  | -                     | 10.2%                 | -                     | -              | 16.2%          |      |
|                                                       |             |           | This work       | 11.6%                | 24.9%               | 4.7%                  |                       | 10.1%                 |                       |                | 18.1%          |      |
|                                                       |             |           | <sup>3,3*</sup> | 11.1%                | 23.9%               | 4.4%                  |                       | 9.5%                  |                       |                | 17.5%          |      |
|                                                       |             |           |                 | 11.1%                | 23.9%               | 4.4%                  |                       | 9.5%                  |                       |                | 17.5%          |      |

|                                                |                |     |                 |       |       |      |       |       |      |       |      |
|------------------------------------------------|----------------|-----|-----------------|-------|-------|------|-------|-------|------|-------|------|
| FA/<br>H <sub>2</sub> O                        | 10,15,18,25–29 | 312 | Reference       | 2.3%  | 5.8%  | -    | 1.1%  | -     | -    | 0.4%  | 1.9% |
|                                                |                |     | This work       | 6.7%  | 7.6%  |      | 2.3%  |       |      | 14.9% | 1.9% |
|                                                |                |     | <sup>3,3*</sup> | 6.5%  | 6.9%  |      | 2.3%  |       |      | 14.9% | 2.1% |
|                                                |                |     |                 | 6.5%  | 6.9%  |      | 2.3%  |       |      | 14.9% | 2.1% |
| FA/<br>H <sub>2</sub> O/<br>OME <sub>1</sub>   | 10             | 26  | Reference       | 21.8% | 19.0% | -    | 13.9% | -     | -    | -     | 8.7% |
|                                                |                |     | This work       | 19.6% | 14.8% |      | 15.2% |       |      |       | 5.9% |
|                                                |                |     | <sup>3,3*</sup> | 20.2% | 16.4% |      | 14.9% |       |      |       | 6.3% |
|                                                |                |     |                 | 20.2% | 16.4% |      | 14.9% |       |      |       | 6.3% |
| FA/<br>H <sub>2</sub> O/<br>OME <sub>2</sub>   | 16             | 6   | Reference       | -     | -     | -    | -     | -     | -    | -     | -    |
|                                                |                |     | This work       | 10.3% | 21.2% |      | 22.6% |       | 6.9% | 0.6%  |      |
|                                                |                |     | <sup>3,3*</sup> | 9.6%  | 17.7% |      | 23.0% |       | 6.7% | 0.6%  |      |
|                                                |                |     |                 | 9.6%  | 17.7% |      | 23.0% |       | 6.7% | 0.6%  |      |
| MeOH/<br>H <sub>2</sub> O/<br>OME <sub>1</sub> | 30             | 23  | Reference       | 5.0%  | -     | 3.2% | 13.4% | 5.5%  | -    | 0.2%  | 2.6% |
|                                                |                |     | This work       | 5.3%  |       | 4.3% | 12.7% | 4.8%  |      | 0.3%  | 4.2% |
|                                                |                |     | <sup>3,3*</sup> | 5.2%  |       | 4.2% | 13.4% | 5.2%  |      | 0.3%  | 2.9% |
|                                                |                |     |                 | 5.2%  |       | 4.2% | 13.4% | 5.2%  |      | 0.3%  | 2.9% |
| MeOH/<br>OME <sub>1</sub>                      | 10             | 63  | Reference       | 1.4%  | -     | 2.0% | -     | 2.1%  | -    | 0.1%  | 1.4% |
|                                                |                |     | This work       | 1.3%  |       | 2.0% |       | 2.0%  |      | 0.1%  | 1.3% |
|                                                |                |     | <sup>3,3*</sup> | 1.8%  |       | 2.4% |       | 2.3%  |      | 0.1%  | 2.4% |
|                                                |                |     |                 | 1.8%  |       | 2.4% |       | 2.3%  |      | 0.1%  | 2.4% |
| MeOH/<br>OME <sub>2</sub>                      | 31             | 22  | Reference       | -     | -     | -    | -     | -     | -    | -     | -    |
|                                                |                |     | This work       | 1.6%  |       | 1.9% |       | 4.6%  |      | 0.1%  |      |
|                                                |                |     | <sup>3,3*</sup> | 4.0%  |       | 4.2% |       | 11.6% |      | 0.4%  |      |
|                                                |                |     |                 | 1.6%  |       | 1.9% |       | 4.6%  |      | 0.1%  |      |
| H <sub>2</sub> O/<br>OME <sub>1</sub>          | 10             | 32  | Reference       | 8.9%  | -     | -    | 14.0% | 14.8% | -    | 0.2%  | 6.6% |
|                                                |                |     | This work       | 7.1%  |       |      | 12.1% | 12.9% |      | 0.0%  | 3.5% |
|                                                |                |     | <sup>3,3*</sup> | 7.2%  |       |      | 12.8% | 13.4% |      | 0.1%  | 2.4% |
|                                                |                |     |                 | 7.2%  |       |      | 12.8% | 13.4% |      | 0.1%  | 2.4% |
| OME <sub>1</sub> /<br>OME <sub>2</sub>         | 31             | 21  | Reference       | -     | -     | -    | -     | -     | -    | -     | -    |
|                                                |                |     | This work       | 1.3%  |       |      |       | 1.4%  | 3.6% | 0.2%  |      |
|                                                |                |     | <sup>3,3*</sup> | 0.8%  |       |      |       | 0.6%  | 2.4% | 0.4%  |      |
|                                                |                |     |                 | 0.8%  |       |      |       | 0.6%  | 2.4% | 0.4%  |      |

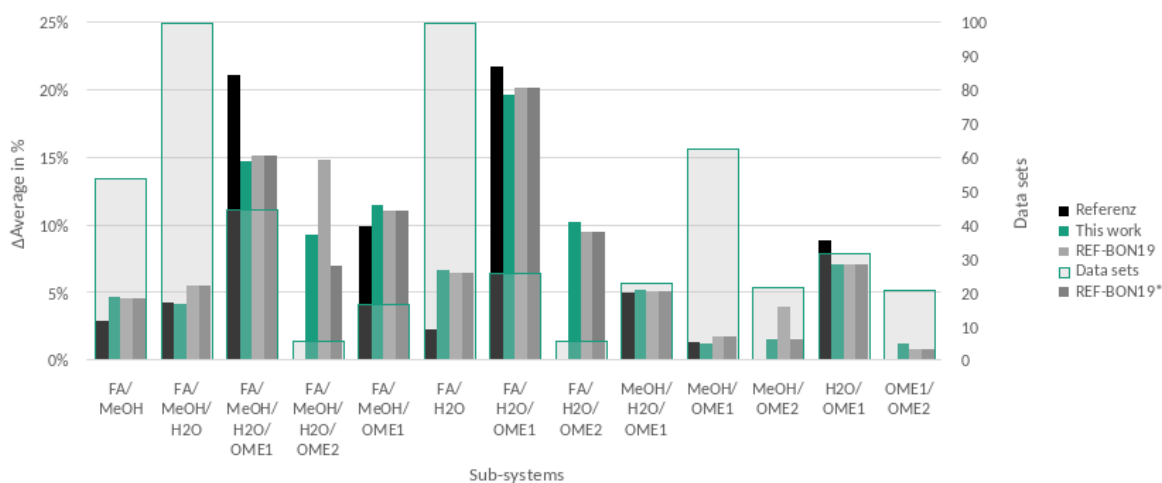

Figure S6 - Average deviation of VLE data from different sub-systems as presented in Table S3.

The validation was conducted using FLASH units in the simulation environment and running sensitivity studies with cases containing the experimental data from the respective literature sources. This procedure was chosen to enable the consideration of the formation of HF<sub>n</sub> and MG<sub>n</sub> in sub-systems containing FA, MeOH and H<sub>2</sub>O. For the validation the overall composition was calculated considering HF<sub>n</sub> and MG<sub>n</sub> as individual FA, MeOH and H<sub>2</sub>O molecules stoichiometrically. For a uniform procedure this approach was applied for sub-systems not containing FA as well.

Following this approach, the knowledge of the feed composition, pressure and temperature level is required. Since the experimental data usually only contain the composition of the liquid and the vapor phase as well as temperature and pressure level but no information regarding the mass distribution between liquid and vapor phase an assumption was made to define the feed composition. It was assumed that the feed composition is equal to the composition of the liquid phase. To keep the resulting error small the vapor fraction in the flash

unit was set to a small value of  $1 \times 10^{-4}$  to  $1 \times 10^{-5}$ , depending on the sub-system. The choice of the vapor fraction was based on the error between the resulting liquid phase composition to the liquid phase composition from the experimental data which was generally smaller 0.1 %, only in a few cases the error increases to 0.5%.

The results in Table S3 and Figure S6 show that the model predictions agree well with the experimental results. In addition to the deviations between the components, temperatures, and pressure themselves an average deviation is included enabling a fast comparison between different models. The deviations of the different models are generally very close to each other. A small improvement is visible for the model of This work and Bongartz et. al.,<sup>3\*</sup> which is mainly a result of the updated model parameters from Schmitz et al.<sup>16</sup> The behavior of most of the sub-systems is described well by the model approach. However, systems containing the components FA/MeOH/H<sub>2</sub>O/OME<sub>1</sub>, FA/MeOH/H<sub>2</sub>O/OME<sub>2</sub>, FA/MeOH/OME<sub>1</sub>, FA/H<sub>2</sub>O/OME<sub>1</sub> and FA/H<sub>2</sub>O/OME<sub>2</sub> show strong deviations of partly more than 20%. This is also the case for the Reference model which presents the model predictions published together with experimental data sets. Therefore, especially the predictions of the interactions between FA and OME show potential for improvement with improved experimental data sets.

## 2.4 Reaction systems

MeOH is synthesized from H<sub>2</sub> and CO<sub>2</sub> according to reactions (1)-(3) in the main script. The reactions were simulated in an isothermal plug-flow reactor considering the reaction kinetics by Nestler et. al.<sup>1</sup> and steam production for cooling.

FA(aqueous) is synthesized from MeOH and O<sub>2</sub> according to reactions (4)-(6) in the main script. The reactions were simulated in an adiabatic yield reactor assuming 98 % conversion of MeOH and a selectivity of 90 % towards FA.<sup>3</sup> FA(anhydrous) is synthesized from MeOH according to reactions (7) and (8) in the main script. The reactions were simulated in an isothermal yield reactor assuming 100 % conversion of MeOH and a selectivity of 70 % towards FA and 30 % towards CO.<sup>7</sup>

OME<sub>1</sub> is synthesized from MeOH and FA considering reactions (9)-(13) in the main script. The reactions were simulated in an isothermal plug-flow reactor. Reaction (9)-(12) proceed rapidly, therefore their equilibrium composition was simulated, independent of the length of the reactor. For reaction (13) the kinetic model by<sup>32</sup> was used by Bongartz et. al.<sup>3</sup> The formation of side products like dimethyl ether, trioxane and methyl format were not considered.

For the reactive distillation column only reaction (13) was considered on the trays containing catalyst, while reactions (9)-(12) were considered on the other trays. To facilitate the presentation of the results only the overall compositions are given in this work. Therefore, the compositions of HF<sub>n</sub> and MG<sub>n</sub> are considered as individual FA, MeOH and H<sub>2</sub>O molecules. For more details see Schmitz et. al.<sup>33</sup>

OME<sub>n</sub> is synthesized from MeOH, OME<sub>1</sub> and FA considering reactions (9)-(15) in the main script. The reactions were simulated in an isothermal plug-flow reactor. For reactions (13)-(15) the kinetic model from Schmitz et. al.<sup>34</sup> was used. The model was implemented using the Reaction class Custom in Aspen Plus® which cannot be used together with equilibrium models. Therefore, reaction (9)-(12) were implemented in kinetic models assuming a very fast conversion by adding a high factor to the model. Like the simulation of the OME<sub>1</sub> synthesis no side products were considered, and the results are presented in overall compositions.

## 2.5 Process component sizing

After the convergence of the heat integrated process simulations of P1-P4 the process unit operations were sized as a core step towards their cost evaluation. The applied approaches for the sizing of the different process unit operation types is described in the following.

### Heat Exchangers

The area of the heat exchangers was sized using the heat flow  $\dot{Q}$  calculated by Aspen Plus®, the logarithmic temperature difference  $\Delta T_{ln}$  and the thermal transmittance  $U$  mainly for shell and tube heat exchanger suggested by<sup>35</sup> in following equation.

$$A_{\text{Heat Exchanger}} = \dot{Q} / (U \cdot \Delta T_{ln}) \quad (3)$$

This approach was used for all heat exchangers, condensers, and evaporators, including the ones from the distillation columns.

### Reactors

The reactors were sized using the gas hourly space velocity GHSV, the weight hourly space velocity WHSV or a kinetic model. The reactor for the methanol synthesis was sized using the kinetic model to estimate the volume of the reactive zone and assuming a pipe diameter of 38 mm, pipe length of 7 m and a void fraction of 0.4 according to Reza Zahedi et. al.<sup>36</sup> The number of pipes was adjusted to meet the reaction volume. To estimate the amount of catalyst required the density was estimated with 1775 kg/m<sup>3</sup>. For the reactions inside the FA synthesis reactor a GHSV of 15 000 h<sup>-1</sup> was assumed.<sup>37</sup> This was assumed for both the aqueous and the anhydrous FA synthesis. The amount of catalyst required was estimated assuming a density of 1200 kg/m<sup>3</sup> and the volume of the reactor was estimated assuming a total volume of 3 times the volume required for the catalyst. For the OME<sub>1</sub> and OME<sub>n</sub> synthesis a WHSV of 30 h<sup>-1</sup> was assumed.<sup>34</sup> With a catalyst density of 1100 kg/m<sup>3</sup> and a void fraction of 0.4 the reactor volume was defined. For the geometry of the pipes a diameter of 20 mm and a length of 10 m was assumed while the number of

pipes was adjusted to meet the required reaction volume. The dimensions of the applied Gibbs reactor for the combustion of the purge streams were defined by Aspen Process Economic Analyzer V11.

### Distillation columns

Distillation columns were sized by Aspen Process Economic Analyzer V11 which estimates the dimensions of the column, a condensate accumulator, and a reflux drum pump. For the distillation columns in the MeOH, OME<sub>1</sub> and OME<sub>n</sub> sub processes the columns were assumed to be packed with Beta rings (BX) packing. The absorber in the FA synthesis sub processes were assumed to be filled with Beta-rings and sieve trays.<sup>38</sup> Reboiler and condenser are heat exchangers and were estimated analogous to the other heat exchangers.

The absorption columns in the FA(anhydrous) step were assumed as ideal separation units in the simulation. For economic evaluation, their dimensions were estimated from the column dimension in the FA(aqueous) step assuming the same height and a diameter adapted to the corresponding mass flow according to  $d_2 = d_1 * (\dot{m}_2 / \dot{m}_1)^{1/2}$ .

### Membrane

The membrane area of H<sub>2</sub> separation A<sub>M</sub> was estimated based on the following assumptions:

- the membrane performance is independent of the membrane selectivity (pressure ratio limit),
- the pressure drop between feed inlet and retentate outlet is negligible,
- the residual H<sub>2</sub> mole fraction in the retentate is assumed 0.1, the H<sub>2</sub> mole fraction in the permeate is 0.9,
- The effective membrane area can be approximated by averaging the minimum and maximum area obtained from the feed (inlet) and retentate (outlet) conditions.

Thus, A<sub>M</sub> was calculated according to:

$$A_M = \frac{y_{p,H_2} \dot{n}_p}{\bar{P}_{M,H_2} (x_{F/R,H_2} p_R - y_{p,H_2} p_p)} \quad (5)$$

with the mole fraction of H<sub>2</sub> in the permeate  $y_{p,H_2}$  and in the feed  $x_{F/R,H_2}$ , the mole flow of the permeate  $\dot{n}_p$ , and the pressure of the retentate  $p_R$  and the permeate  $p_p$ . The permeability of the membrane according to  $\bar{P}_{M,H_2} = 100 \cdot 10^{-6} \text{cm}^3 \text{ (STP) cm}^{-2} \text{ s}^{-1} \text{ cm Hg}^{-1}$  Baker et al.<sup>39</sup> was considered.

The membrane to separate H<sub>2</sub>O in the OME<sub>n</sub> sub-process was assumed to work similar to the PERVAP 4101 which was applied for H<sub>2</sub>O separation of similar mixtures by Schmitz et. al.<sup>6</sup> published a simple equation to estimate the membrane area for the H<sub>2</sub>O separation. This equation was used to size the membranes in the OME<sub>n</sub> sub-processes of P1-P4. The membrane was simulated using an ideal separator which separates all the H<sub>2</sub>O present in the feed mixture to the permeate. It was assumed that H<sub>2</sub>O chemically bound in MG<sub>n</sub> was not separated. Therefore, considering the overall concentrations the retentate still contains H<sub>2</sub>O. The difference in H<sub>2</sub>O concentration between the feed and the retentate was used to size the membrane area needed for the H<sub>2</sub>O separation.

### Multistage compressors

Multistage compressors are used in the MeOH sub-process. The sizing of the compression was conducted by Aspen Plus® and the sizing of the heat exchangers for intermediate cooling was implemented the same way the other heat exchangers were sized.

The other process unit operations were either dimensioned by Aspen Process Economic Analyzer V11, like pumps, compressors and flash units or neglected for the economic analysis, like valves, mixers, and splitters.

## 2.6 Process energy integration

The heat integration was conducted following the Pinch method using Aspen Energy Analyzer. Only heat exchangers were considered which do not transfer heat from or to heating or cooling utilities like e.g. the reactors for the MeOH and FA synthesis and the combustion and the heat exchangers for heating or quenching of the FA feed or product before or after the reactor. After the design of the heat exchanger network the flow sheet of the simulation was adjusted and step-by-step converged.

## 3 Process evaluation

### 3.1 Economic evaluation

#### Basic Assumptions and framework conditions

For a detailed listing of the general assumptions and conditions for the economic evaluation in this work see Table S4

#### Specific equipment cost

Specific equipment costs were preferably taken from Peters et al.,<sup>40</sup> if adequate. Another reference basis was chosen in the following cases:



- **Multitube reactors**  
According to the recommendation in Peters et al.<sup>40</sup> specific costs of floating head heat exchanger were taken for the specific cost of multitube reactors. In Peters et al.<sup>40</sup> a tube length and diameter dependent cost function for floating head heat exchangers is given. However, the tube lengths of up to 10 m in this work exceed the upper limit of 6 m in Peters et al.,<sup>40</sup> significantly, while no degression coefficient for a reasonable extrapolation is given. Hence, specific costs (only dependent on the surface area) were taken from Woods.<sup>41</sup> However, no pressure factor is given for floating head heat exchanger in this reference. To account for the reaction pressure of 70 bar in the MeOH synthesis step a pressure factor of 1.25 was assumed taken from a double pipe HEX in Woods.<sup>41</sup>
- **Fixed-bed reactors**  
Area surfaces of up to 22.8 m<sup>2</sup> were determined for the fixed bed reactors in the simulations. While the upper limit of 10 m<sup>2</sup> given in Peters et al.<sup>40</sup> would have resulted in a separation into 3 reactors, the upper limit of the surface area in Woods<sup>41</sup> of 500 m<sup>2</sup> is far above 22.8 m<sup>2</sup>. This higher limit was assumed to be more reasonable for the current state of the art and specific fixed-bed reactor costs from Woods<sup>41</sup> were applied in this work.
- **Thin film evaporators**  
Sizing of the thin film evaporators revealed surface areas of up to 195 m<sup>2</sup>. In the work of Deibele and Dohrn<sup>42</sup> an upper limit of 50 m<sup>2</sup> for the heat transfer area of thin film evaporators is given while the capacity in Peters et al.<sup>40</sup> only ranges up to 12 m<sup>2</sup> without stating a degression coefficient for the specific cost. Hence, specific costs and a degression factor were taken from Woods<sup>41</sup> assuming an upper capacity limit of 50 m<sup>2</sup>.
- **Membrane modules**  
Membrane module costs are taken from Baker et al.<sup>39</sup> as no cost data for membranes are specified in Peters et al.<sup>40</sup> Ranges of manufacturing costs are given for different membrane module types in Baker et al.<sup>39</sup> High-pressure modules are generally more expensive than modules for low-pressure or vacuum application Baker et al.<sup>39</sup> As the latter are applied in this work the lower value of the price range is taken. Additionally, it is stated in Baker et al.,<sup>39</sup> that “the selling price is typically 2-5 times higher” than the manufacturing price. Hence, the manufacturing price was multiplied by the mean value of 3.5 for the calculation of the specific purchased equipment cost of membrane modules.

#### Specific cost of raw materials and utilities

**Table S4** - Overview of specific cost of raw materials and utilities assumed in this work.

| Raw material/utility                  | Specific cost | Unit             | Reference                                                                    |
|---------------------------------------|---------------|------------------|------------------------------------------------------------------------------|
| Cu/ZnO/Al <sub>2</sub> O <sub>3</sub> | 95.24         | €/kg             | <sup>43</sup>                                                                |
| Silver                                | 427.60        | €/kg             | Mean trading price in 2018 <sup>44</sup>                                     |
| Na <sub>2</sub> CO <sub>3</sub>       | 25            | €/kg             | Bulk estimation based on prices for small quantities from ref. <sup>45</sup> |
| Amberlyst 46                          | 45            | €/kg             | Bulk estimation based on prices for small quantities from ref. <sup>46</sup> |
| N <sub>2</sub>                        | 12.5          | €/t              | <sup>47</sup>                                                                |
| Steam 4 bar                           |               |                  |                                                                              |
| Purchasing                            | 22.8          | €/t              | <sup>47</sup>                                                                |
| Selling                               | 16.0          | €/t              | <sup>47</sup> (70% of purchase price)                                        |
| Steam 20 bar                          |               |                  |                                                                              |
| Purchasing                            | 23.1          | €/t              | <sup>47</sup>                                                                |
| Selling                               | 16.2          | €/t              | <sup>47</sup> (70% of purchase price)                                        |
| Electricity                           | 50            | €/MWh            | <sup>47</sup>                                                                |
| Compressed Air                        | 0.02          | €/m <sup>3</sup> | <sup>48</sup>                                                                |
| Cooling water                         | 0.0035        | €/m <sup>3</sup> | <sup>49</sup>                                                                |
| Wastewater                            | 3.8           | €/m <sup>3</sup> | <sup>50</sup>                                                                |

### Catalyst lifetimes

**Table S5** - Overview of catalyst lifetimes assumed in this work.

| Catalyst                              | Lifetime [months] | Ref.                                                              |
|---------------------------------------|-------------------|-------------------------------------------------------------------|
| Cu/ZnO/Al <sub>2</sub> O <sub>3</sub> | 48                | <sup>51</sup>                                                     |
| Silver                                | 5.5               | <sup>37</sup> (range of 3-8 months given there, mean value taken) |
| Na <sub>2</sub> CO <sub>3</sub>       | 12                | estimation                                                        |
| Amberlyst 46                          | 12                | estimation                                                        |

### Cost factors

**Table S6** - Cost factors applied for the calculation of CAPEX.

| CAPEX                        | Main equipment<br>(Ref. <sup>40</sup> ) | Main compressors<br>(estimated) | Basis |
|------------------------------|-----------------------------------------|---------------------------------|-------|
| <b>Direct cost factors</b>   |                                         |                                 |       |
| Installation                 | 0.47                                    |                                 | EC    |
| Instrumentation and control  | 0.36                                    |                                 | EC    |
| Piping system                | 0.68                                    |                                 | EC    |
| Electrical system            | 0.11                                    |                                 | EC    |
| Buildings                    | 0.18                                    |                                 | EC    |
| Yard improvements            | 0.10                                    |                                 | EC    |
| Service facilities           | 0.70                                    |                                 | EC    |
| <b>Indirect cost factors</b> |                                         |                                 |       |
| Engineering and supervision  | 0.33                                    |                                 | EC    |
| Construction expenses        | 0.41                                    |                                 | EC    |
| Legal expenses               | 0.04                                    |                                 | EC    |
| Contractor's fee             | 0.22                                    |                                 | EC    |
| Contingency                  | 0.44                                    |                                 | EC    |
| <b>Sum</b>                   | <b>5.04</b>                             | <b>2.27</b>                     |       |
| Working Capital              | 0.15                                    | 0.15                            | TCI   |
| Interest rate                | 0.05                                    | 0.05                            |       |

**Table S7** - Cost factors applied for the calculation of OPEX.

| OPEX                         | Value | Basis        | Ref. |
|------------------------------|-------|--------------|------|
| <b>Direct cost factors</b>   |       |              |      |
| Operating supervision (OV)   | 0.15  | OL           | 52   |
| Maintenance labor (ML)       | 0.01  | FCI          | 40   |
| Maintenance material (MM)    | 0.01  | FCI          | 40   |
| Operating supplies (OS)      | 0.15  | ML&MM        | 52   |
| Laboratory charges           | 0.2   | OL           | 52   |
| <b>Indirect cost factors</b> |       |              |      |
| Insurance and taxes          | 0.02  | FCI          | 52   |
| Plant overhead costs (PO)    | 0.5   | TLC=OL+OV+ML | 40   |
| Administrative costs         | 0.25  | PO           | 52   |

## Results and discussion

Table S8 - Breakdown of the equipment costs calculated in this work.

|                                      | Purchased equipment costs<br>[Mio€ <sub>2018</sub> ] |             |             |             |
|--------------------------------------|------------------------------------------------------|-------------|-------------|-------------|
|                                      | P1                                                   | P2          | P3          | P4          |
| <b>Cost breakdown equipment type</b> |                                                      |             |             |             |
| Compressors                          | 7.7                                                  | 13.3        | 7.6         | 9.4         |
| Pumps                                | 0.1                                                  | 0.1         | 0.2         | 0.1         |
| Heater/HEX                           | 12.9                                                 | 27.9        | 11.8        | 20.2        |
| Reactors                             | 4.3                                                  | 4.4         | 4.6         | 4.6         |
| Separators                           | 4.0                                                  | 3.7         | 4.3         | 6.2         |
| <b>SUM</b>                           | <b>29.0</b>                                          | <b>49.3</b> | <b>28.5</b> | <b>40.5</b> |
| <b>Cost breakdown process steps</b>  |                                                      |             |             |             |
| MeOH sub-process                     | 15.6                                                 | 19.0        | 15.5        | 18.0        |
| FA(aqueous/anhydrous) sub-process    | 7.7                                                  | 25.9        | 6.3         | 16.2        |
| OME <sub>3-5</sub> sub-process       | 4.0                                                  | 1.7         | 3.6         | 2.9         |
| Heat recovery                        | 1.6                                                  | 2.6         | 1.7         | 1.9         |
| OME <sub>1</sub> sub-process         | --                                                   | --          | 1.3         | 1.5         |
| <b>SUM</b>                           | <b>29.0</b>                                          | <b>49.3</b> | <b>28.5</b> | <b>40.5</b> |

Table S9 - Breakdown of the OPEX<sub>R&U</sub> calculated in this work.

|                                                                           | Raw material/utility cost<br>[Mio€ <sub>2018</sub> /a] |               |               |               |
|---------------------------------------------------------------------------|--------------------------------------------------------|---------------|---------------|---------------|
|                                                                           | P1                                                     | P2            | P3            | P4            |
| CO <sub>2</sub>                                                           | 60.33                                                  | 67.26         | 59.78         | 67.98         |
| H <sub>2</sub>                                                            | 113.32                                                 | 88.55         | 112.30        | 89.57         |
| N <sub>2</sub>                                                            | --                                                     | 0.25          | --            | 0.25          |
| Cu/ZnO/Al <sub>2</sub> O <sub>3</sub>                                     | 1.47                                                   | 1.47          | 1.48          | 1.48          |
| Silver (FA(aqueous)) / Na <sub>2</sub> CO <sub>3</sub><br>(FA(anhydrous)) | 4.58                                                   | 0.18          | 4.45          | 0.21          |
| Amberlyst® 46                                                             | 0.09                                                   | 0.11          | 0.15          | 0.11          |
| Wastewater                                                                | 0.52                                                   | 0.38          | 0.51          | 0.38          |
| Steam, 20 bar                                                             | 7.21                                                   | 6.10          | 4.73          | -1.16         |
| Steam, 4 bar                                                              | -1.40                                                  | -1.02         | 1.82          | 4.84          |
| Electricity                                                               | 2.34                                                   | 8.71          | 2.31          | 8.84          |
| Compressed Air                                                            | 5.14                                                   | 5.41          | 5.17          | 5.72          |
| Cooling water                                                             | 0.20                                                   | 0.14          | 0.14          | 0.12          |
| <b>SUM</b>                                                                | <b>193.79</b>                                          | <b>177.53</b> | <b>192.84</b> | <b>178.34</b> |

**Table S10** - Assumptions for economic evaluation in this work and in;<sup>53</sup> The lines highlighted in orange represent the adapted values for the comparison of the economic evaluations.

|                                     | This work                                                                                                                          | Reference                                        | Schemme et al. <sup>53</sup> |
|-------------------------------------|------------------------------------------------------------------------------------------------------------------------------------|--------------------------------------------------|------------------------------|
| Base year                           | 2018                                                                                                                               | <sup>47</sup>                                    | 2017                         |
| Annual full load hours [h/a]        | 8000                                                                                                                               | <sup>47</sup>                                    | 8000                         |
| Plant operation time [a]            | 20                                                                                                                                 | <sup>47</sup>                                    | 20                           |
| Plant capacity [MW]                 | 66.25                                                                                                                              |                                                  | 300                          |
| Interest rate                       | 5%                                                                                                                                 | <sup>47</sup>                                    | 8%                           |
| LHV <sub>diesel</sub> [MJ/l]        | 35.9                                                                                                                               | <sup>54</sup>                                    | 35.9                         |
| LHVOME <sub>3-5</sub> [MJ/kg]       | 18.9                                                                                                                               | <sup>9</sup>                                     | 19.22                        |
| CO <sub>2</sub> price [€/t]         | 309                                                                                                                                | <sup>47</sup>                                    | 70                           |
| H <sub>2</sub> price [€/kg]         | 4.2                                                                                                                                | <sup>47</sup>                                    | 4.6                          |
| CO <sub>2</sub> feed                | 25°C, 1 bar                                                                                                                        |                                                  | 25°C, 30 bar                 |
| H <sub>2</sub> feed                 | 25°C, 30 bar                                                                                                                       |                                                  | 25°C, 30 bar                 |
| Cooling water<br>Delta T [°C]       | 15-25                                                                                                                              | <sup>47</sup>                                    | 20-25                        |
| Cost [€/t]                          | 0.0035                                                                                                                             | <sup>49</sup>                                    | 0.1                          |
| High pressure steam<br>Conditions   | 220°C, 20 bar                                                                                                                      |                                                  | 250°C, 39.7 bar              |
| Cost [€/t]                          | 23.1                                                                                                                               | <sup>47</sup>                                    | 32                           |
| Medium pressure steam<br>Conditions | 150°C, 4 bar                                                                                                                       |                                                  | 175°C, 8.9 bar               |
| Cost [€/t]                          | 22.8                                                                                                                               | <sup>47</sup>                                    | 32                           |
| Low pressure steam<br>Conditions    | --                                                                                                                                 |                                                  | 125°C, 2.3 bar               |
| Cost [€/t]                          | --                                                                                                                                 | <sup>47</sup>                                    | 32                           |
| Electricity cost [€/MWh]            | 50                                                                                                                                 | <sup>47</sup>                                    | 97.6                         |
| $\eta_{isen}$ compressors           | 80%                                                                                                                                |                                                  | 76%                          |
| $\eta_{isen}$ pumps                 | 80 % (70 % for reflux pumps)                                                                                                       | <sup>47</sup>                                    | 60%                          |
| Max. compression ratio per stage    | 2.5-3                                                                                                                              |                                                  | 3                            |
| Min. temp. difference [K]           | 10                                                                                                                                 |                                                  | 10                           |
| Pressure loss                       | 100 mbar for reactors and separators,<br>340 mbar for HEX, 6.9 mbar per stage<br>for columns > 1 bar, none for vacuum<br>equipment | HEX: <sup>55</sup><br><br>columns: <sup>56</sup> | none                         |

**Table S11** - Comparison of ACC, OPEX and NPC from this work (with adapted assumptions according to Table S5 and from Schemme et al.<sup>53</sup>)

|                                 | This work<br>(with adapted assumptions) |                                                              |      | Schemme et al. <sup>53</sup> |                                                              |      |
|---------------------------------|-----------------------------------------|--------------------------------------------------------------|------|------------------------------|--------------------------------------------------------------|------|
|                                 | ACC                                     | OPEX <sub>tot</sub><br>[€ <sub>2017</sub> /l <sub>DE</sub> ] | NPC  | ACC                          | OPEX <sub>tot</sub><br>[€ <sub>2017</sub> /l <sub>DE</sub> ] | NPC  |
| P1/Route A                      | 0.28                                    | 3.39                                                         | 3.67 | 0.165                        | 3.30                                                         | 3.46 |
| P2                              | 0.48                                    | 2.99                                                         | 3.47 |                              |                                                              |      |
| P3                              | 0.27                                    | 3.42                                                         | 3.69 |                              |                                                              |      |
| P4                              | 0.40                                    | 2.99                                                         | 3.39 |                              |                                                              |      |
| Route B<br>(Trioxan + Methylal) |                                         |                                                              |      | 0.309                        | 3.43                                                         | 3.74 |
| Route C<br>(Trioxan + DME)      |                                         |                                                              |      | 0.338                        | 3.62                                                         | 3.96 |

### 3.2 CO<sub>2</sub> footprint evaluation

**Table S12** - LCA datasets for the comparison of the four OME<sub>3-5</sub> routes.

| Flow                   | Dataset                                                   | Region | Value                                            | Reference |
|------------------------|-----------------------------------------------------------|--------|--------------------------------------------------|-----------|
| <b>H<sub>2</sub></b>   | Polymer electrolyte membrane (PEM) electrolysis, 2018     | DE     | 27.21 kg CO <sub>2</sub> -eq./kg H <sub>2</sub>  | 47        |
|                        | Solid oxide electrolyzer cell (SOEC), 2018                | DE     | 21.50 kg CO <sub>2</sub> -eq./kg H <sub>2</sub>  | 47        |
|                        | Alkaline electrolysis (AEL), 2018                         | DE     | 26.09 kg CO <sub>2</sub> -eq./kg H <sub>2</sub>  | 47        |
|                        | Hydrogen (steam reforming natural gas)                    | DE     | See reference.                                   | 57        |
| <b>CO<sub>2</sub></b>  | Direct air capture (DAC), 2018                            | DE     | -0.56 kg CO <sub>2</sub> -eq./kg CO <sub>2</sub> | 47        |
|                        | Monoethanolamine (MEA) cement, 2018                       | DE     | -0.96 kg CO <sub>2</sub> -eq./kg CO <sub>2</sub> | 47        |
| <b>Electricity</b>     | Power grid mix, 2018                                      | DE     | 0.50 kg CO <sub>2</sub> -eq./kWh <sub>el</sub>   | 47        |
|                        | Power grid mix, 2030                                      | DE     | 0.31 kg CO <sub>2</sub> -eq./kWh <sub>el</sub>   | 47        |
|                        | Power grid mix, 2050                                      | DE     | 0.08 kg CO <sub>2</sub> -eq./kWh <sub>el</sub>   | 47        |
|                        | electricity production, wind, 1-3MW turbine, onshore      | DE     | See reference.                                   | 58        |
| <b>Heat &lt; 250°C</b> | steam production, as energy carrier, in chemical industry | Europe | See reference.                                   | 58        |
| <b>Heat &gt; 250°C</b> | Electrode boiler                                          | —      | See reference.                                   | 59        |
|                        | heat production, natural gas, at boiler modulating >100kW | Europe | See reference.                                   | 58        |
| <b>Cooling water</b>   | market for water, decarbonised                            | DE     | See reference.                                   | 58        |
| <b>Wastewater</b>      | treatment of wastewater, average, capacity 1E9l/year      | Europe | See reference.                                   | 58        |
| <b>Nitrogen</b>        | market for nitrogen, liquid                               | Europe | See reference.                                   | 58        |
| <b>Compressed air</b>  | market for compressed air, 600 kPa gauge                  | Europe | See reference.                                   | 58        |

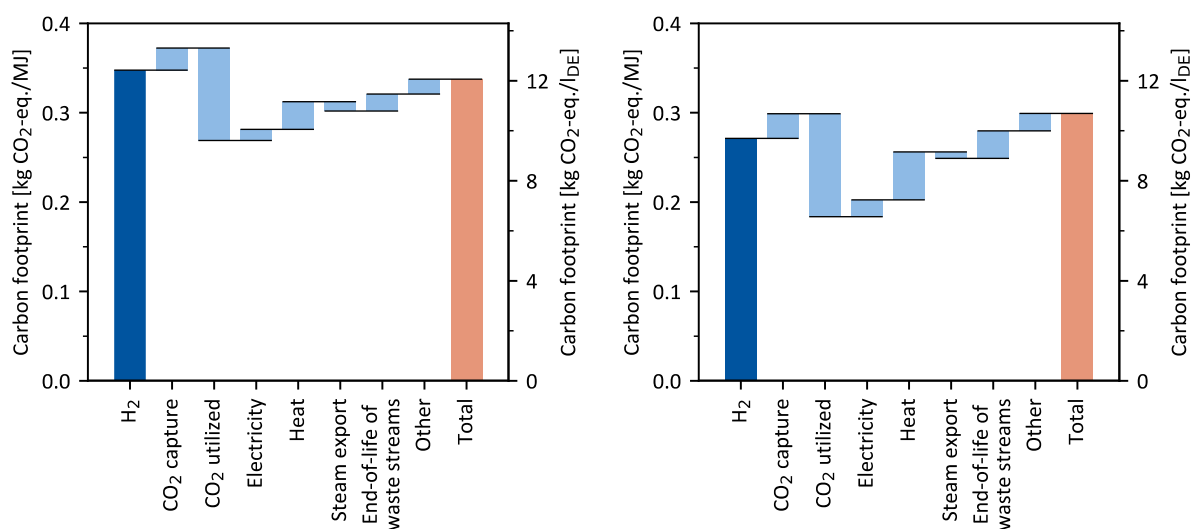

**Figure S7** - Contribution analysis of the carbon footprint of the OME<sub>3.5</sub> process routes P1 (left) and P2 (right) for the year 2018. The left y-axis shows the carbon footprint in kg CO<sub>2</sub>-eq./MJ, while the right y-axis additionally indicates results in kg CO<sub>2</sub>-eq./lDE. The end-of-life of waste streams considers CO<sub>2</sub> in the exhaust gas and carbon carriers in the wastewater. Minor emissions due to wastewater treatment and the supply of cooling water, nitrogen, and compressed air are summarized as "other".

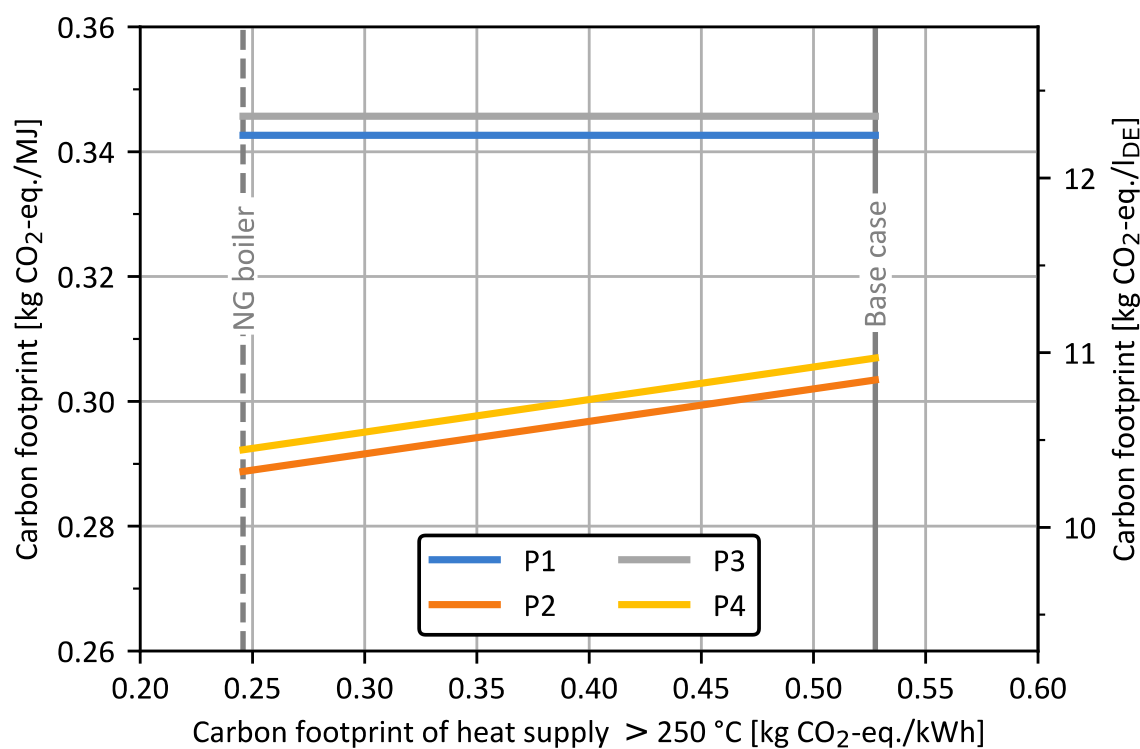

**Figure S8** - Sensitivity analysis for the carbon footprint of all four OME<sub>3.5</sub> process routes depending on the carbon footprint of high-temperature heat supply for the year 2018. The left y-axis shows the carbon footprint in kg CO<sub>2</sub>-eq./MJ, while the right y-axis additionally indicates results in kg CO<sub>2</sub>-eq./lDE. NG boiler: natural gas boiler.<sup>58</sup>

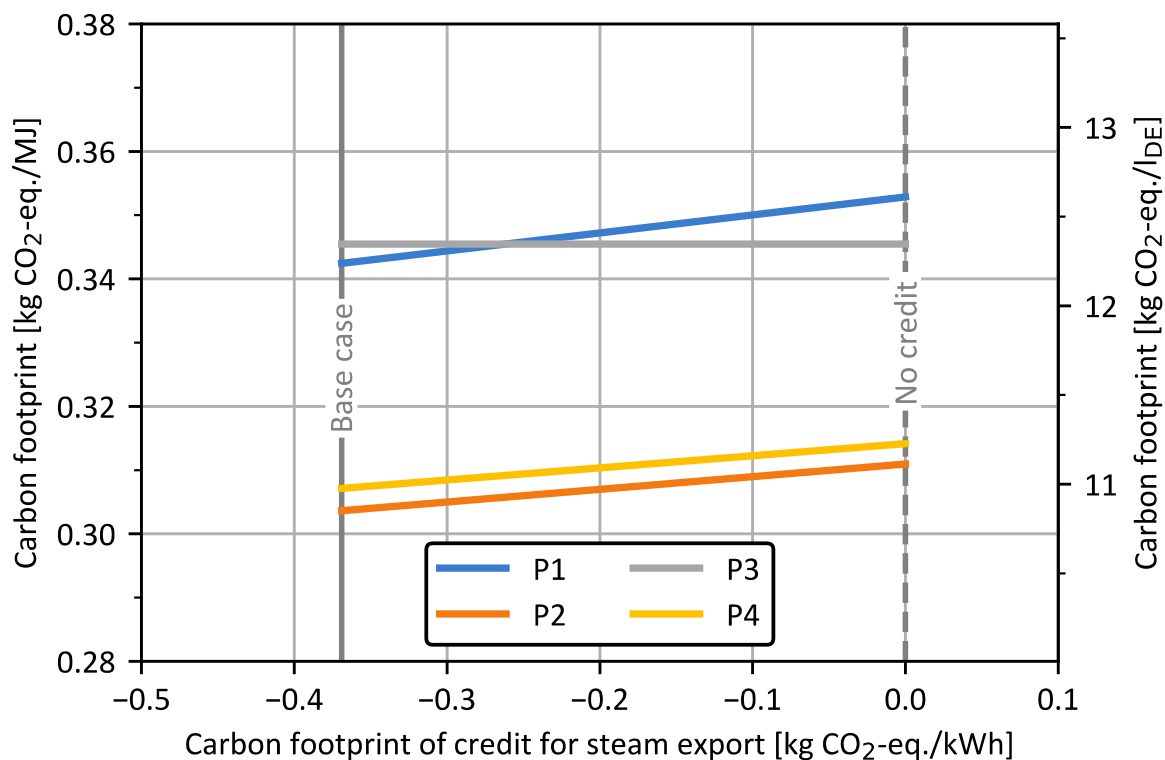

**Figure S9** - Sensitivity analysis for the carbon footprint of all four OME<sub>3.5</sub> process routes depending on the environmental credit, i.e., avoided burden, for steam export for the year 2018. The left y-axis shows the carbon footprint in kg CO<sub>2</sub>-eq./MJ, while the right y-axis additionally indicates results in kg CO<sub>2</sub>-eq./lDE.

### 3.3 TRL evaluation

**Table S13** - TRL levels used published in the energy research program of the German federal government.<sup>60,61</sup>

| TRL | Definition                                                                                                                            |
|-----|---------------------------------------------------------------------------------------------------------------------------------------|
| 1   | A basic principle has been scientifically observed, which can be considered for a technology/process/etc.                             |
| 2   | The functionality and possible applications of a technology/process/or the like has been scientifically described.                    |
| 3   | For individual elements of the technology/process (or similar), proof of function has been provided in a laboratory/test environment. |
| 4   | General function of the technology/process/etc. could be demonstrated in the laboratory/in a test environment                         |
| 5   | Technology/process/etc. has been implemented in an application-oriented overall system and general feasibility has been demonstrated  |
| 6   | Demonstration plant/concept works in application-like environment                                                                     |
| 7   | Prototype with system-relevant properties exists and is tested in the operating environment                                           |
| 8   | Sales sample/prototype is available and meets all requirements of the end application                                                 |
| 9   | Commercial use                                                                                                                        |

### 3.4 Evaluation Criteria Results

An overview of the process evaluation criteria namely process energy efficiency, NPC, CO<sub>2</sub> footprint and TRL of the four considered processes is summarized in the following web diagrams for the years 2018, 2030 and 2050

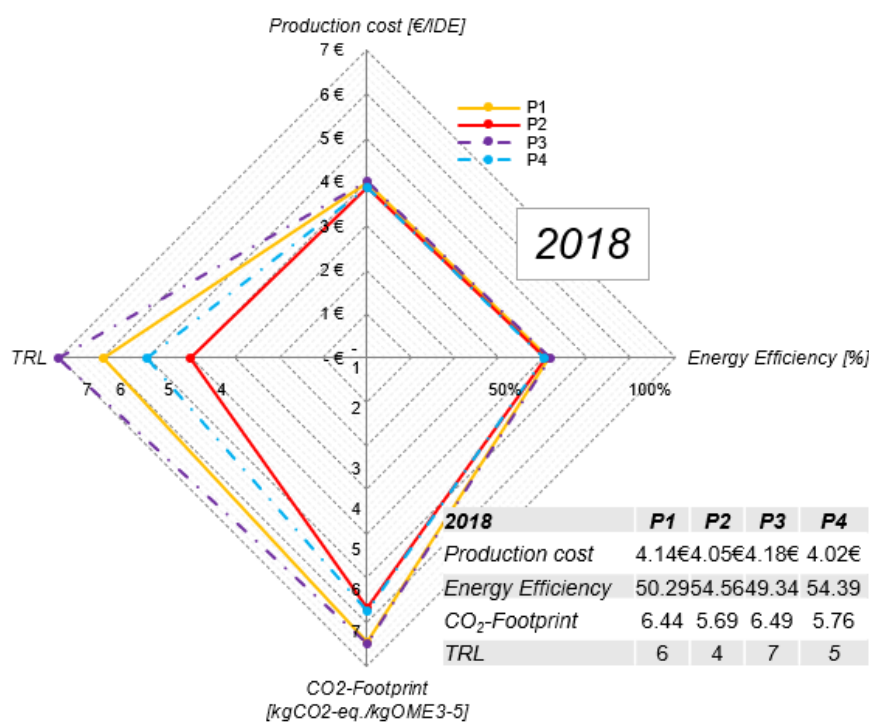

**Figure S10** - The base case scenario in 2018 main results represented in a web-diagram of all four OME<sub>3-5</sub> process routes; production cost in €/l<sub>DE</sub>, energy efficiency in %, CO<sub>2</sub> footprint in kg CO<sub>2</sub>-eq./kgOME<sub>3-5</sub> and TRL.

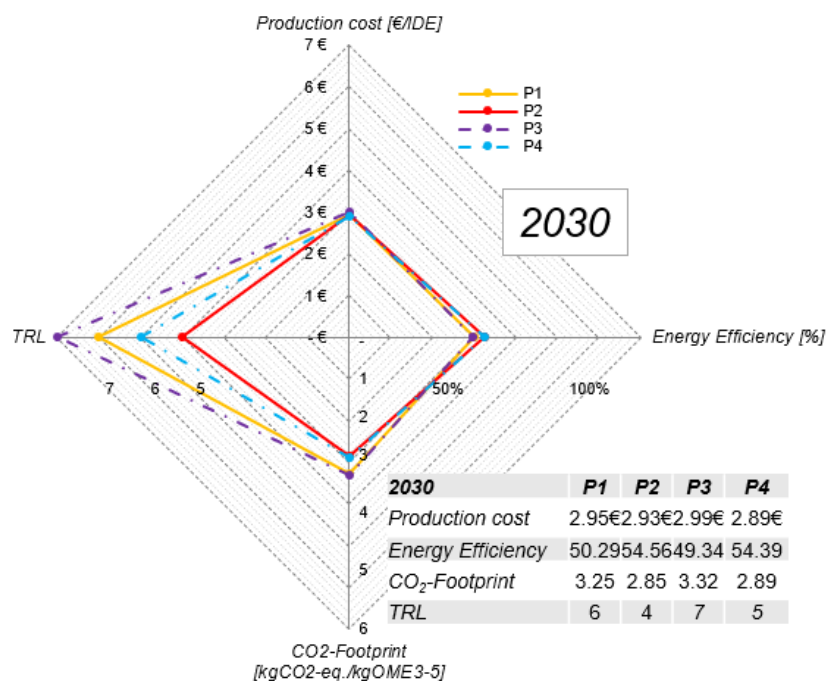

**Figure S11** - The base case scenario in 2030 main results represented in a web-diagram of all four OME<sub>3-5</sub> process routes; production cost in €/l<sub>DE</sub>, energy efficiency in %, CO<sub>2</sub> footprint in kg CO<sub>2</sub>-eq./kgOME<sub>3-5</sub> and TRL.



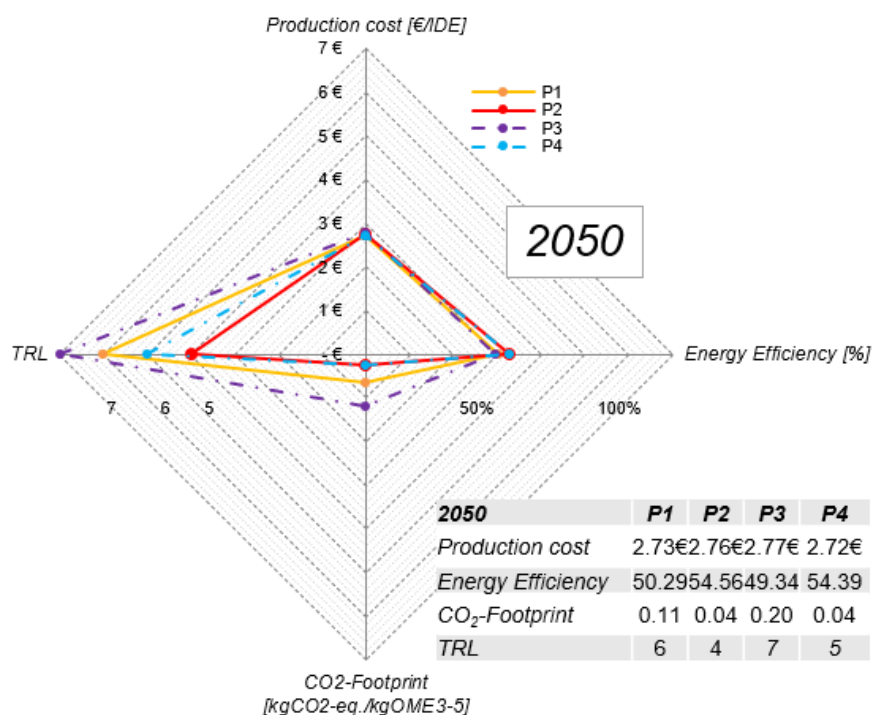

**Figure S12** - The base case scenario in 2050 main results represented in a web-diagram of all four OME<sub>3.5</sub> process routes; production cost in €/l<sub>DE</sub>, energy efficiency in %, CO<sub>2</sub> footprint in kg CO<sub>2</sub>-eq./kg<sub>OME3.5</sub> and TRL.

## Nomenclature

### Abbreviations

#### Abbreviations

ACC

CAPEX

CO

CO<sub>2</sub>

DME

EC

FA

FCI

H<sub>2</sub>H<sub>2</sub>O

HF

KPIs

LHV

MEA

MeOH

MG

N<sub>2</sub>

NPC

O<sub>2</sub>

OME

OME<sub>1</sub>OME<sub>n</sub>

OPEX

OPEX<sub>dir/ind</sub>OPEX<sub>R&U</sub>

#### Full Name

Annual capital cost

Capital expenditures

Carbon monoxide

Carbon dioxide

Dimethyl ether

Equipment cost

Formaldehyde

Fixed capital investment

Hydrogen

Water

poly(oxymethylene) hemiformals

Key performance indicators

Lower heating value

Mono-ethanol amine

Methanol

poly(oxymethylene) glycols

Nitrogen

Net production costs

Oxygen

Oxymethylene dimethyl ethers

Methylal

OME of chain length n

Operational expenditures

Direct and indirect operational expenditures

Raw material and utility costs

|     |                             |
|-----|-----------------------------|
| TCI | Total capital investment    |
| TEA | Techno-economic assessments |

### Symbols and Indices

| Symbol or Indices | Name                              |
|-------------------|-----------------------------------|
| $c_p^{ig}$        | Heat capacity of ideal gas        |
| $g_0$             | Standard free energy of formation |
| $\Delta_v h$      | Enthalpy of vaporization          |
| $h_0$             | Standard enthalpy of formation    |
| $p_c$             | Critical pressure                 |
| $p^v$             | Vapor pressure                    |
| $T_c$             | Critical temperature              |
| $H$               | Dynamic viscosity                 |
| $\Lambda$         | Thermal conductivity              |
| $\rho$            | Density                           |
| $\Sigma$          | Surface tension                   |
| $\eta_{Mass}$     | Mass efficiency                   |
| $\eta_c$          | Carbon efficiency                 |
| $\eta_{Energy}$   | Process energy efficiency         |
| $n$               | Order of the reaction             |
| $P$               | Pressure                          |
| $T$               | Temperature                       |
| $h_{labor}$       | Employee-hours per year           |
| %                 | Percentage                        |
| $l_{DE}$          | Liter diesel equivalent           |

## References

1. F. Nestler, A. R. Schütze, M. Ouda, M. J. Hadrich, A. Schaadt, S. Bajohr and T. Kolb, *Chem. Eng. J.*, 2020, **394**, 124881.
2. D. Bongartz, L. Doré, K. Eichler, T. Grube, B. Heuser, L. E. Hombach, M. Robinus, S. Pischinger, D. Stolten, G. Walther and A. Mitsos, *Applied Energy*, 2018, **231**, 757.
3. D. Bongartz, J. Burre and A. Mitsos, *Industrial & Engineering Chemistry Research*, 2019.
4. E. Ströfer, H. Hasse, K. Schilling and M. Sohn, *Highly Concentrated Formaldehyde solution, Production and Reaction thereof*(US 7,193,115 B2), 2007.
5. N. Schmitz, E. Ströfer, J. Burger and H. Hasse, *Industrial & Engineering Chemistry Research*, 2017, **56**, 11519.
6. N. Schmitz, C. F. Breitkreuz, E. Ströfer, J. Burger and H. Hasse, *Journal of Membrane Science*, 2018, **564**, 806.
7. J. Sauer and G. Emig, *Chem. Eng. Technol.*, 1995, **18**, 284.
8. S. Su, P. Zaza and A. Renken, *Chem. Eng. Technol.*, 1994, **17**, 34.
9. M. Held, Y. Tönges, D. Pélerin, M. Härtl, G. Wachtmeister and J. Burger, *Energy Environ. Sci.*, 2019, **12**, 1019.
10. M. Albert, *Thermodynamische Eigenschaften formaldehydhaltiger Mischungen*, Shaker Verlag, Aachen, 1999.
11. H. Hasse, *Dampf-Flüssigkeits-Gleichgewichte, Enthalpien und Reaktionskinetik in formaldehydhaltigen Mischungen*, Universität Kaiserslautern, Kaiserslautern, 1990.
12. C. Kuhnert, *Dampf-Flüssigkeits-Gleichgewichte in mehrkomponentigen formaldehydhaltigen [formaldehydhaltigen] Systemen*, Shaker, Aachen, 2004.
13. J. Burger, E. Ströfer and H. Hasse, *Chemical Engineering Research and Design*, 2013, **91**, 2648.
14. D. Oestreich, *Prozessentwicklung zur Gewinnung von Oxymethylenethern (OME) aus Methanol und Formaldehyd*, Dissertation, KIT Scientific Publishing, 2017.
15. G. Maurer, *AIChE J.*, 1986, **32**, 932.
16. N. Schmitz, C. F. Breitkreuz, E. Ströfer, J. Burger and H. Hasse, *Chemical Engineering and Processing - Process Intensification*, 2018. 10.1016/j.cep.2018.06.012.
17. C. Kuhnert, M. Albert, S. Breyer, I. Hahnenstein, H. Hasse and G. Maurer, *Ind. Eng. Chem. Res.*, 2006, **45**, 5155.
18. H. Hasse and G. Maurer, *Fluid Phase Equilibria*, 1991, **64**, 185.
19. Y. M. Blazhin, L. K. Vagina, V. E. Pastor, A. I. Morozova and S. K. Ogorodnikov, *In Zhur. Prikl. Khim.* (49), pp. 174–178., 1976.

20. L. V. Kogan and S. K. Ogorodnikov, In JOURNAL OF APPLIED CHEMISTRY OF THE USSR 53 (1), pp. 98–102., 1980.
21. M. Albert, B. Coto García, C. Kuhnert, R. Peschla and G. Maurer, AIChE J., 2000, **46**, 1676.
22. S. J. Green and R. E. Vener, Ind. Eng. Chem., 1955, **47**, 103.
23. L. V. Kogan and S. K. Ogorodnikov, In JOURNAL OF APPLIED CHEMISTRY OF THE USSR 53 (1), pp. 102–105., 1980.
24. Z. Shan, Y. Wang, S. Qiu, C. Zheng and J. Shi, Fluid Phase Equilibria, 1995, **111**, 113.
25. C. Kuhnert, Dampf-Flüssigkeits-Gleichgewichte in mehrkomponentigen formaldehydhaltigen Systemen, Technischen Universität Kaiserslautern, 2005.
26. T. Grützner and H. Hasse, Journal of Chemical and Engineering Data - J CHEM ENG DATA, 2004, **49**. 10.1021/je030243h.
27. B. Olsson and Svensson, In Trans. Inst. Chem. Eng. (53), pp. 97–105., 1975.
28. Y. M. Blazhin, K. I. Valuev, L. V. Kogan, T. N. Tyvina and A. A. Kharchenko, In Zhur. Prikl. Khim. 50 (1), pp. 36–38., 1977.
29. L. V. Kogan, Y. M. Blazhin, S. K. Ogorodnikov and V. V. Kafarov, In Zhur. Prikl. Khim. 50 (12), pp. 2682–2687., 1977.
30. M. Albert, I. Hahnenstein, H. Hasse and G. Maurer, J. Chem. Eng. Data, 2001, **46**, 897.
31. Y. H. Song, J. Q. Li and J. F. Ding, Chem. Eng.(China), 2015, 30.
32. J.-O. Drunsel, M. Renner and H. Hasse, Chemical Engineering Research and Design, 2012, **90**, 696.
33. N. Schmitz, F. Homberg, J. Berje, J. Burger and H. Hasse, Industrial & Engineering Chemistry Research, 2015, **54**, 6409.
34. N. Schmitz, J. Burger and H. Hasse, Industrial & Engineering Chemistry Research, 2015, **54**, 12553.
35. VDI, VDI-Wärmeatlas: Mit 320 Tabellen, Springer Vieweg, Berlin, Heidelberg, 2013.
36. A. Elkamel, G. Reza Zahedi, C. Marton and A. Lohi, Energies, 2009, **2**, 180.
37. Ullmann's Encyclopedia of Industrial Chemistry, Wiley-VCH Verlag GmbH & Co. KGaA, Weinheim, Germany, 2012.
38. C. G. Braz, N. Lutters, J. Rocha, R. Alvim, E. Y. Kenig and H. A. Matos, Ind. Eng. Chem. Res., 2020, **59**, 5996.
39. R. W. Baker, Membrane technology and applications, J. Wiley, Chichester, New York, 2010.
40. M. S. Peters, K. D. Timmerhaus and R. E. West, Plant design and economics for chemical engineers, McGraw-Hill, Boston, 2003.
41. D. R. Woods, Rules of thumb in engineering practice, Wiley-VCH, Weinheim, 2007.
42. L. Deibele and R. Dohrn, eds., Miniplant-Technik in der Prozessindustrie, Wiley-VCH, Weinheim, 2006.
43. M. Pérez-Fortes and E. Tzimas, Techno-economic and environmental evaluation of CCU for fuel production: Synthesis of methanol and formic acid, 2016.
44. Silver price development in euro and dollar. <https://www.gold.de/kurse/silberpreis/entwicklung/>, (last accessed August 2021).
45. Sodium carbonate, ACS primary standard, 99.95-100.05% (dried basis), 33377. 2020, Thermo Fisher GmbH: Karlsruhe. <https://www.alfa.com/de/catalog/033377/>, (last accessed August 2021).
46. SigmaAldrich: Amberlyst 15(wet) ion-exchange resin, CAS 39389-20-3 2020, Merck KGaA: Darmstadt. <https://www.sigmaaldrich.com/DE/de>, (last accessed August 2021).
47. J. Prause, M. Raab, R.-U. Dietrich (2020), private communication. Framework assumptions TEA, Begleitforschung Energiewende im Verkehr (BEniVer).
48. R. Dindorf, Procedia Engineering, 2012, **39**, 204.
49. WasEG, Gesetz über die Erhebung eines Entgelts für die Entnahme von Wasser aus Gewässern (Wasserentnahmeentgeltgesetz des Landes Nordrhein-Westfalen - WasEG) [aw on the levying of a charge for the abstraction of water from bodies of water (Water Abstraction Charge Act of the State of North Rhine-Westphalia - WasEG). 2004.
50. Bitterfeld-Wolfen, C., Preisblatt gemäß § 10 der AGB-E der Chemiepark BitterfeldWolfen GmbH [Price sheet according to § 10 of the AGB-E of Chemiepark BitterfeldWolfen GmbH], 2020. [https://www.chemiepark.de/fileadmin/chemiepark\\_de/content/dokumente/preisblatt\\_agb-e\\_ab\\_2020.pdf](https://www.chemiepark.de/fileadmin/chemiepark_de/content/dokumente/preisblatt_agb-e_ab_2020.pdf), (last accessed August 2021).
51. Bartholomew, C.H. and Farrauto, R.J., Can. J. Chem. Eng., 2007, **85**, 127.
52. F. G. Albrecht, D. H. König, N. Baucks and R.-U. Dietrich, Fuel, 2017, **194**, 511.
53. S. Schemme, J. L. Breuer, M. Köller, S. Meschede, F. Walman, R. C. Samsun, R. Peters and D. Stolten, International Journal of Hydrogen Energy, 2020, **45**, 5395.
54. E. S. Heidrich, S. R. Edwards, J. Dolfig, S. E. Cotterill and T. P. Curtis, Bioresource technology, 2014, **173**, 87.
55. K. S. N. Raju, Fluid mechanics, heat transfer, and mass transfer: Chemical engineering practice, Wiley, Hoboken, N.J., 2010.
56. E. J. Henley and J. Seader, Equilibrium-stage separation operations in chemical, John Wiley and Sons Ltd, 1981.
57. V. Bouillon-Delporte, J. C., N. Brahy, Clean Hydrogen - Monitor 2020, Hydrogen Europe Intelligence Departement., 2020.
58. G. Wernet, C. Bauer, B. Steubing, J. Reinhard, E. Moreno-Ruiz and B. Weidema, Int J Life Cycle Assess, 2016, **21**, 1218.
59. L. J. Müller, A. Kätelhön, S. Bringezu, S. McCoy, S. Suh, R. Edwards, V. Sick, S. Kaiser, R. Cuéllar-Franca, A. El Khamlichi, J. H. Lee, N. v. d. Assen and A. Bardow, Energy Environ. Sci., 2020, **13**, 2979.
60. M. Héder, The Innovation Journal, 2018, **22**.

61. 7th Energy Research Programme of the Federal Government - Research for an environmentally-friendly, reliable and affordable energy supply. <https://www.bmwi.de/Redaktion/EN/Artikel/Energy/research-for-an-ecological-reliable-and-affordable-power-supply.html>, (last accessed June 2021).
